# Supplementary material for: Methanol Production by a Broad Phylogenetic Array of Marine Phytoplankton
Source: PLoS One. 2016 Mar 10;11(3):e0150820. doi: 10.1371/journal.pone.0150820 (PMC4786210; doi:10.1371/journal.pone.0150820)
Supplement: S1 Fig — (XLSX) [file pone.0150820.s001.xlsx]

## Sheet: Sheet1
TIC: 2014_9_MeOH_01.D\datasim.ms										Dilution of standard	Methanol concentration (nM)				avg
MQ											x-values	1	2	3	y-values	sd
										10^-8	240	11322	10164	7858	9781.33	1763.42
1	4.659	BB	0.093	1791	4.549	4.787				10^-7	2400	63017	59180	62416	61537.7	2063.79
2	4.893	BB	0.076	10109	4.803	5.135				10^-6	24000	561120	599139	608204	589488	24981.7
3	11.423	BB	0.127	2754	11.246	11.61
4	13.052	BB	0.167	16340	12.657	13.378
5	15.74	BB	0.114	7456	15.53	16.045
TIC: 2014_9_MeOH_02.D\datasim.ms
1x10-8
1	4.876	BV	0.079	2697	4.768	5.023
2	13.047	BB	0.168	11322	12.522	13.383
3	15.744	BB	0.1	1019	15.392	15.824
TIC: 2014_9_MeOH_03.D\datasim.ms
1x10-8
1	4.433	BV	0.102	1829	4.25	4.568
2	4.874	BV	0.074	1997	4.808	5.004
3	13.071	BB	0.161	10164	12.818	13.355
TIC: 2014_9_MeOH_04.D\datasim.ms
1x10-8
1	4.866	BB	0.078	1992	4.747	5.023
2	13.041	PV	0.125	7858	12.721	13.157
3	17.68	BV	0.021	254.44	17.492	17.7
TIC: 2014_9_MeOH_05.D\datasim.ms
1x10-7
1	4.407	BB	0.109	1751	4.181	4.559
2	4.89	VV	0.091	2417	4.737	4.998
3	13.075	BV	0.189	63017	12.731	13.655
4	18.108	BV	0	-3144	17.444	18.135
TIC: 2014_9_MeOH_06.D\datasim.ms
1x10-7
1	4.426	BB	0.151	4694	4.177	4.769
2	4.889	BB	0.078	2111	4.807	5.063
3	13.08	BV	0.187	59180	12.749	13.413
4	15.765	VB	0.193	6314	15.577	16.081
5	18.043	BV	0	-8438	17.15	18.074
TIC: 2014_9_MeOH_07.D\datasim.ms
1x10-7
1	4.367	BV	0.149	2445	4.223	4.508
2	4.529	VV	0.124	3742	4.508	4.779
3	4.888	VB	0.111	3137	4.779	5.138
4	13.072	BV	0.183	62416	12.497	13.631
5	15.769	BB	0.108	1660	15.437	15.927
TIC: 2014_9_MeOH_08.D\datasim.ms
1x10-6
1	4.387	BV	0.111	3028	4.195	4.592
2	4.883	BB	0.087	1968	4.797	5.063
3	13.08	BB	0.194	561120	12.507	14.154
TIC: 2014_9_MeOH_09.D\datasim.ms
1x10-6
1	4.436	PV	0.112	1780	4.265	4.578
2	4.885	BB	0.088	2464	4.709	5.101
3	13.061	BB	0.199	599139	12.675	14.112
TIC: 2014_9_MeOH_10.D\datasim.ms
1x10-6
1	4.432	BV	0.136	3081	4.242	4.536
2	4.603	VV	0.151	4792	4.536	4.811
3	4.877	VB	0.098	2502	4.811	5.068
4	13.066	BB	0.204	608204	12.698	14.191
TIC: 2014_9_MeOH_11.D\datasim.ms
MQ
1	4.416	BV	0.146	2071	4.172	4.564
2	4.719	VV	0.113	1481	4.564	4.802
3	13.062	BV	0.175	3061	12.539	13.421
TIC: 2014_9_MeOH_12.D\datasim.ms
MQ
1	4.402	BB	0.093	2375	4.144	4.671
2	13.061	BV	0.177	3307	12.707	13.389
3	17.991	BV	0	-4431	17.29	18.018
TIC: 2014_9_MeOH_13.D\datasim.ms
MQ
1	4.429	BV	0.074	840.62	4.014	4.569
2	13.036	BV	0.127	3697	12.708	13.221
